# Supplementary material for: Assembly of Nanoions via Electrostatic Interactions: Ion-Like Behavior of Charged Noble Metal Nanoclusters
Source: PubMed Central journal article supplement (PMC3900922; doi:10.1038/srep03848), 2014-01-24
Supplement: srep03848-s1.pdf [file srep03848-s1.pdf]

Supplementary Information for

**Assembly of Nanoions via Electrostatic Interactions: Ion-Like Behavior of  
Charged Noble Metal Nanoclusters**

Qiaofeng Yao, Zhentao Luo, Xun Yuan, Yue Yu, Chao Zhang, Jianping Xie\* and Jim Yang Lee\*

*Department of Chemical and Biomolecular Engineering, National University of Singapore,*

*10 Kent Ridge Crescent, Singapore 119260*

\*To whom correspondence should be addressed. Emails: cheleej@nus.edu.sg (JYL) /

chexiej@nus.edu.sg (JX)

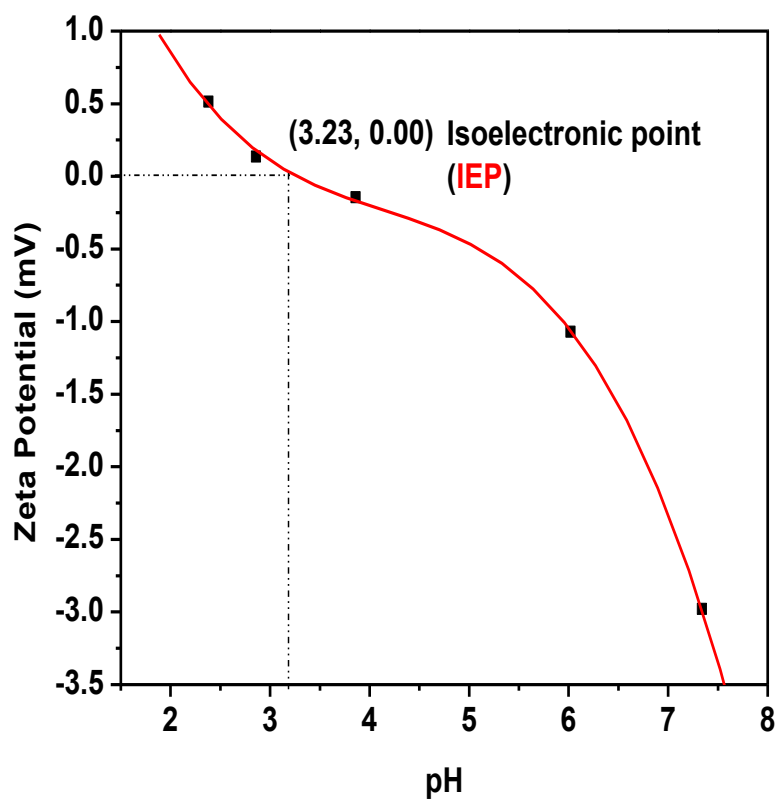

**Figure S1** pH dependence of the  $\zeta$ -potential of orange-emitting Au NCs. The isoelectric point (IEP) of the Au NCs was estimated to be 3.23.

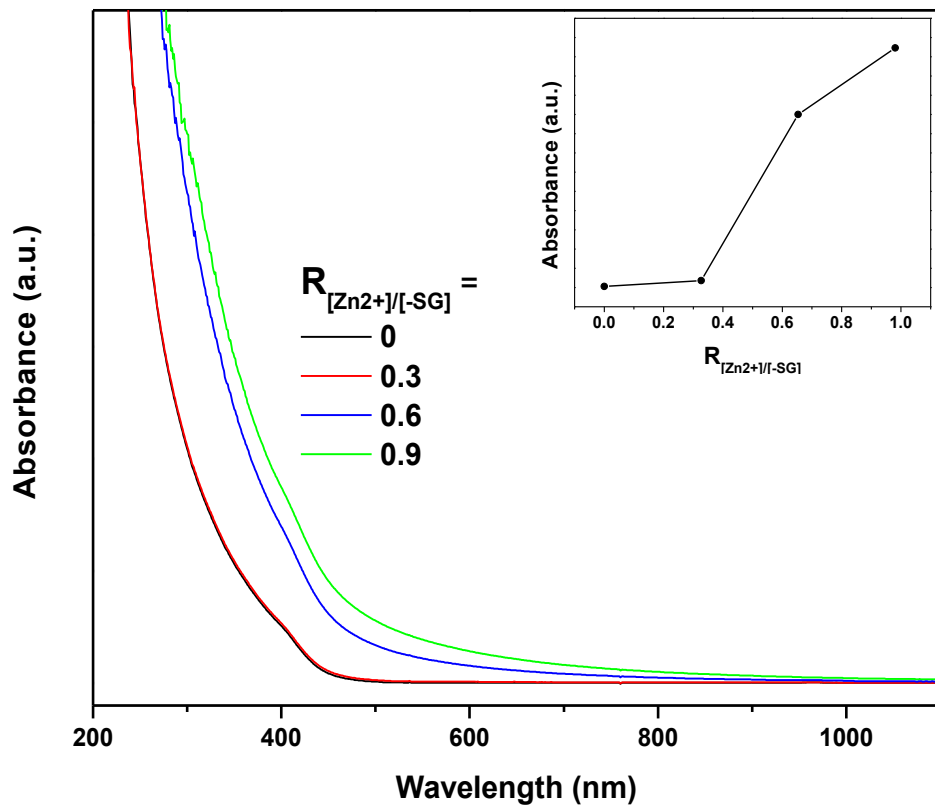

**Figure S2** UV-vis absorption spectra of Au NCs assembled at different  $R_{[Zn^{2+}]/[-SG]}$  values; the inset shows the absorbance at 400 nm as a function of  $R_{[Zn^{2+}]/[-SG]}$ .

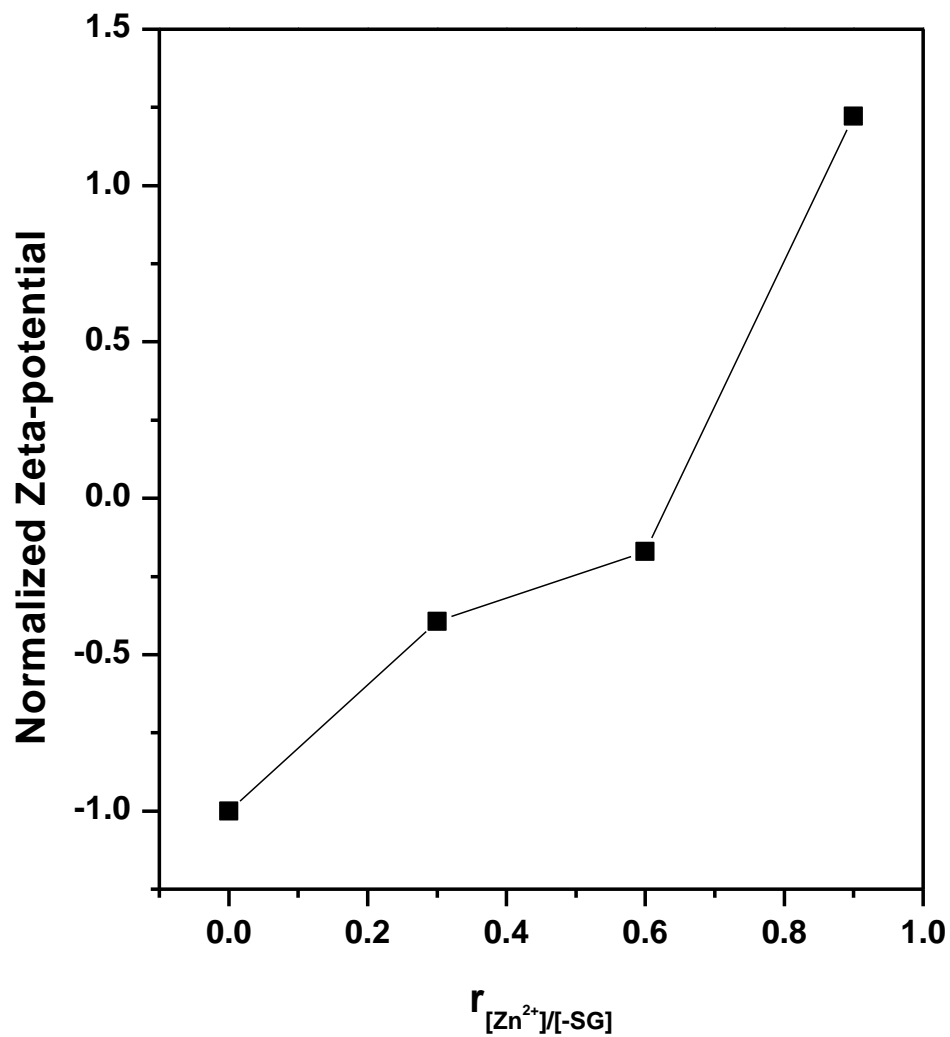

**Figure S3**  $\zeta$ -potential of Au NCs assembled under different  $R_{[Zn^{2+}]/[-SG]}$  values. The  $\zeta$ -potential at  $R_{[Zn^{2+}]/[-SG]} = 0$  was arbitrarily set at -1 for ease of comparison.

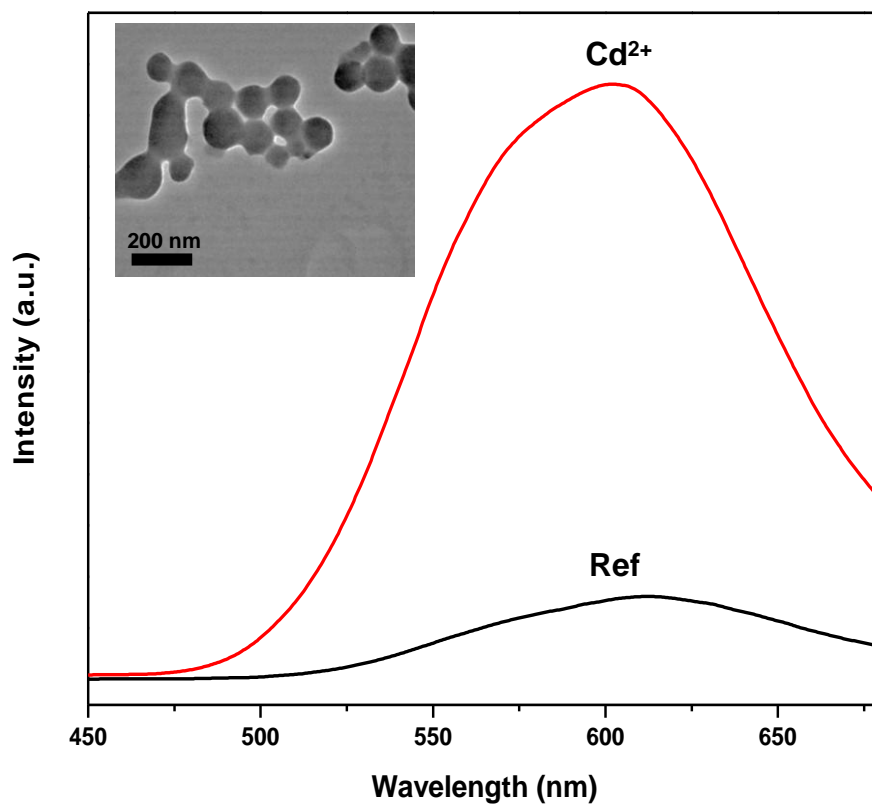

**Figure S4** Photoemission spectrum (after excitation at 365 nm) of Au NCs assembled by Cd<sup>2+</sup> (red lines) with corresponding TEM image shown as an inset. The black line corresponds to Au NCs without Cd<sup>2+</sup>.

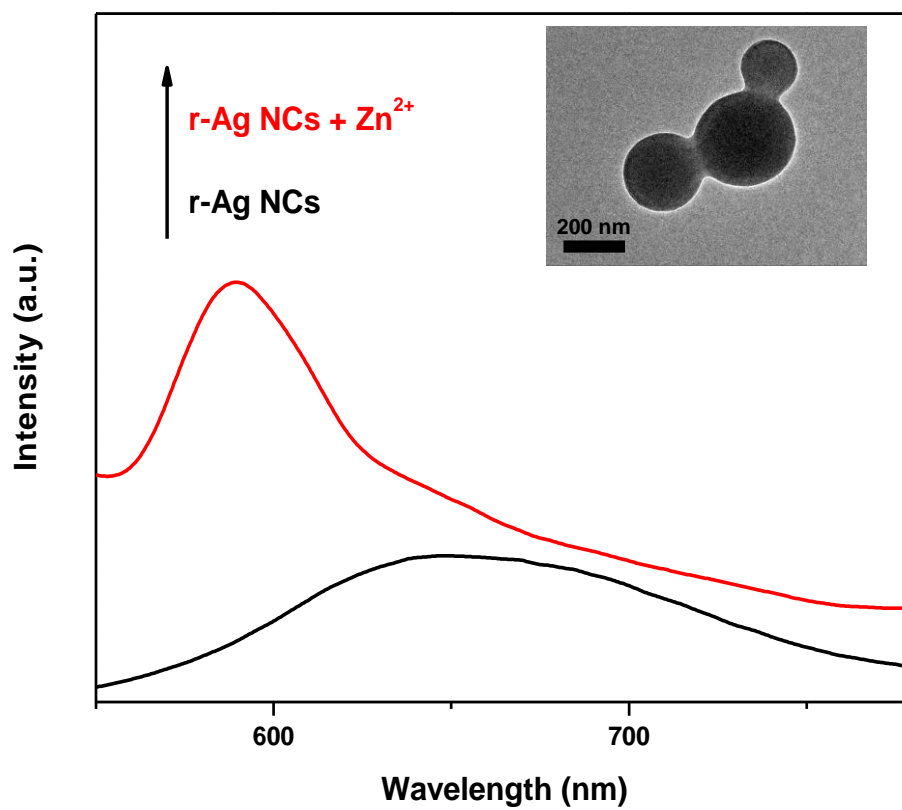

**Figure S5** Photoemission spectrum (after excitation at 440 nm) of red-emitting Ag NCs assembled by Zn<sup>2+</sup> (red lines) with the corresponding TEM image shown as an inset. The black line corresponds to Ag NCs without Zn<sup>2+</sup>.
